# Supplementary material for: Genomic Epidemiology of Shiga Toxin-Producing Escherichia coli Isolated from the Livestock-Food-Human Interface in South America
Source: MDPI journal article supplement (doi:10.3390/ani11071845), 2021-06-22
Supplement: s1 [file s1]

**Table S1.** Name, Sequence Read Archive (SRA) run accession numbers, collection information and ID species results for all 130 STEC strains isolated from cattle, beef and people analyzed in this study.

| Strain          | Run        | Collected by                                                                  | Species ID                                         |
|-----------------|------------|-------------------------------------------------------------------------------|----------------------------------------------------|
| MOD1-EC5234     | SRR3993747 | Penn State E. coli Reference Center                                           | <i>Escherichia coli</i> / <i>Shigella</i> , 99.34% |
| ARIMEC38-12_C1  | SRR6222011 | Malbran                                                                       | <i>Escherichia coli</i> / <i>Shigella</i> , 95.7%  |
| ARIMEC110-16-1M | SRR6222063 | Malbran                                                                       | <i>Escherichia coli</i> / <i>Shigella</i> , 98.83% |
| ARIMEC14-88M    | SRR6222230 | Malbran                                                                       | <i>Escherichia coli</i> / <i>Shigella</i> , 99.63% |
| ARIMEC160-17    | SRR6222303 | Malbran                                                                       | <i>Escherichia coli</i> / <i>Shigella</i> , 100%   |
| ARIMEC855-11    | SRR6222306 | Malbran                                                                       | <i>Escherichia coli</i> / <i>Shigella</i> , 100%   |
| ARIMEC680-04    | SRR6222456 | Malbran                                                                       | <i>Escherichia coli</i> / <i>Shigella</i> , 99.28% |
| ARIMEC286-17    | SRR6222461 | Malbran                                                                       | <i>Escherichia coli</i> / <i>Shigella</i> , 100%   |
| ARIMEC707-08    | SRR6222542 | Malbran                                                                       | <i>Escherichia coli</i> / <i>Shigella</i> , 97.44% |
| ARIMEC731-07    | SRR6222558 | Malbran                                                                       | <i>Escherichia coli</i> / <i>Shigella</i> , 98.86% |
| ARIMEC171-98    | SRR6236803 | Malbran                                                                       | <i>Escherichia coli</i> / <i>Shigella</i> , 99.65% |
| ARIMEC157-15-3M | SRR6236805 | Malbran                                                                       | <i>Escherichia coli</i> / <i>Shigella</i> , 99.64% |
| ARIMEC157-15-2M | SRR6236812 | Malbran                                                                       | <i>Escherichia coli</i> / <i>Shigella</i> , 99.62% |
| EC-0009         | SRR6325149 | Malbran                                                                       | <i>Escherichia coli</i> / <i>Shigella</i> , 98.88% |
| ARIMEC60-11     | SRR6425171 | Malbran                                                                       | <i>Escherichia coli</i> / <i>Shigella</i> , 100%   |
| MOD1-EC5236     | SRR6428552 | Penn State E. coli Reference Center                                           | <i>Escherichia coli</i> / <i>Shigella</i> , 99.09% |
| ARIM-EXH1186-06 | SRR2015682 | Malbran Institute-Argentina                                                   | <i>Escherichia coli</i> / <i>Shigella</i> , 99.53% |
| FWSEC0043       | SRR7947248 | Laboratory for Foodborne Zoonoses, Public Health Agency of Canada             | <i>Escherichia coli</i> / <i>Shigella</i> , 98.8%  |
| CFSAN027343     | SRR8333591 | E. coli Reference Center - Pennsylvania State University, University Park, PA | <i>Escherichia coli</i> / <i>Shigella</i>          |
| ARIM-EXH737-14  | SRR2015244 | Malbran Institute-Argentina                                                   | <i>Escherichia coli</i> / <i>Shigella</i> , 100%   |

|                  |            |                             |                                                    |
|------------------|------------|-----------------------------|----------------------------------------------------|
| ARIM-EXH831-14.6 | SRR2015665 | Malbran Institute-Argentina | <i>Escherichia coli</i> / <i>Shigella</i> , 99.77% |
| ARIM-EXH831-14.5 | SRR2015803 | Malbran Institute-Argentina | <i>Escherichia coli</i> / <i>Shigella</i> , 99.87% |
| ARIM-EXH625-08   | SRR2016400 | Malbran Institute-Argentina | <i>Escherichia coli</i> / <i>Shigella</i> , 100%   |
| ARIM-EXH485-02   | SRR2015685 | Malbran Institute-Argentina | <i>Escherichia coli</i> / <i>Shigella</i> , 100%   |
| ARIM-EXH346-02   | SRR2015792 | Malbran Institute-Argentina | <i>Escherichia coli</i> / <i>Shigella</i> , 100%   |
| ARIM-EXH368-07   | SRR2015802 | Malbran Institute-Argentina | <i>Escherichia coli</i> / <i>Shigella</i> , 99.85% |
| ARIM-EXH1133-06  | SRR2015826 | Malbran Institute-Argentina | <i>Escherichia coli</i> / <i>Shigella</i> , 100%   |
| ARIM-EXH668-08   | SRR2015683 | Malbran Institute-Argentina | <i>Escherichia coli</i> / <i>Shigella</i> , 99.77% |
| ARIM-EXH644-08   | SRR2015804 | Malbran Institute-Argentina | <i>Escherichia coli</i> / <i>Shigella</i> , 100%   |
| ARIM-EXH279-06   | SRR2016393 | Malbran Institute-Argentina | <i>Escherichia coli</i> / <i>Shigella</i> , 100%   |
| CFSAN066347      | SRR6764066 | FDA                         | <i>Escherichia coli</i> / <i>Shigella</i> , 99.13% |
| CFSAN066346      | SRR6764067 | FDA                         | <i>Escherichia coli</i> / <i>Shigella</i> , 99.54% |
| CFSAN066388      | SRR6764068 | FDA                         | <i>Escherichia coli</i> / <i>Shigella</i> , 99.76% |
| CFSAN066334      | SRR6764070 | FDA                         | <i>Escherichia coli</i> / <i>Shigella</i> , 95.44% |
| CFSAN066341      | SRR6764073 | FDA                         | <i>Escherichia coli</i> / <i>Shigella</i> , 78.11% |
| CFSAN066340      | SRR6764074 | FDA                         | <i>Escherichia coli</i> / <i>Shigella</i> , 95.39% |
| CFSAN066345      | SRR6764075 | FDA                         | <i>Escherichia coli</i> / <i>Shigella</i> , 95.67% |
| CFSAN066342      | SRR6764076 | FDA                         | <i>Escherichia coli</i> / <i>Shigella</i> , 98.16% |
| CFSAN066314      | SRR6764077 | FDA                         | <i>Escherichia coli</i> / <i>Shigella</i> , 98.02% |
| CFSAN066313      | SRR6764078 | FDA                         | <i>Escherichia coli</i> / <i>Shigella</i> , 99.8%  |
| CFSAN066312      | SRR6764079 | FDA                         | <i>Escherichia coli</i> / <i>Shigella</i> , 99.71% |
| CFSAN066311      | SRR6764080 | FDA                         | <i>Escherichia coli</i> / <i>Shigella</i> , 100%   |
| CFSAN066319      | SRR6764081 | FDA                         | <i>Escherichia coli</i> / <i>Shigella</i> , 93.61% |
| CFSAN066317      | SRR6764082 | FDA                         | <i>Escherichia coli</i> / <i>Shigella</i> , 94.12% |
| CFSAN066316      | SRR6764083 | FDA                         | <i>Escherichia coli</i> / <i>Shigella</i> , 98.94% |
| CFSAN066315      | SRR6764084 | FDA                         | <i>Escherichia coli</i> / <i>Shigella</i> , 99.28% |
| CFSAN066372      | SRR6764085 | FDA                         | <i>Escherichia coli</i> / <i>Shigella</i> , 97.49% |

|             |            |     |                                                    |
|-------------|------------|-----|----------------------------------------------------|
| CFSAN066371 | SRR6764086 | FDA | <i>Escherichia coli</i> / <i>Shigella</i> , 97.58% |
| CFSAN066322 | SRR6764087 | FDA | <i>Escherichia coli</i> / <i>Shigella</i> , 100%   |
| CFSAN066320 | SRR6764088 | FDA | <i>Escherichia coli</i> / <i>Shigella</i> , 95.58% |
| CFSAN066368 | SRR6764089 | FDA | <i>Escherichia coli</i> / <i>Shigella</i> , 94.45% |
| CFSAN066367 | SRR6764090 | FDA | <i>Escherichia coli</i> / <i>Shigella</i> , 93.27% |
| CFSAN066366 | SRR6764091 | FDA | <i>Escherichia coli</i> / <i>Shigella</i> , 96.64% |
| CFSAN066365 | SRR6764092 | FDA | <i>Escherichia coli</i> / <i>Shigella</i> , 97.6%  |
| CFSAN066370 | SRR6764093 | FDA | <i>Escherichia coli</i> / <i>Shigella</i> , 99.25% |
| CFSAN066309 | SRR6764094 | FDA | <i>Escherichia coli</i> / <i>Shigella</i> , 97.76% |
| CFSAN066302 | SRR6764096 | FDA | <i>Escherichia coli</i> / <i>Shigella</i> , 100%   |
| CFSAN066301 | SRR6764097 | FDA | <i>Escherichia coli</i> / <i>Shigella</i> , 99.3%  |
| CFSAN066303 | SRR6764099 | FDA | <i>Escherichia coli</i> / <i>Shigella</i> , 99.45% |
| CFSAN066306 | SRR6764100 | FDA | <i>Escherichia coli</i> / <i>Shigella</i> , 100%   |
| CFSAN066308 | SRR6764102 | FDA | <i>Escherichia coli</i> / <i>Shigella</i> , 98.02% |
| CFSAN066307 | SRR6764103 | FDA | <i>Escherichia coli</i> / <i>Shigella</i> , 96.73% |
| CFSAN066390 | SRR6764104 | FDA | <i>Escherichia coli</i> / <i>Shigella</i> , 99.33% |
| CFSAN066391 | SRR6764105 | FDA | <i>Escherichia coli</i> / <i>Shigella</i> , 97.99% |
| CFSAN066386 | SRR6764106 | FDA | <i>Escherichia coli</i> / <i>Shigella</i> , 98.4%  |
| CFSAN066387 | SRR6764108 | FDA | <i>Escherichia coli</i> / <i>Shigella</i> , 98.86% |
| CFSAN066332 | SRR6764110 | FDA | <i>Escherichia coli</i> / <i>Shigella</i> , 98.1%  |
| CFSAN066326 | SRR6764114 | FDA | <i>Escherichia coli</i> / <i>Shigella</i> , 99.29% |
| CFSAN066323 | SRR6764115 | FDA | <i>Escherichia coli</i> / <i>Shigella</i> , 96.76% |
| CFSAN066324 | SRR6764116 | FDA | <i>Escherichia coli</i> / <i>Shigella</i> , 98%    |
| CFSAN066329 | SRR6764117 | FDA | <i>Escherichia coli</i> / <i>Shigella</i> , 97.79% |
| CFSAN066327 | SRR6764119 | FDA | <i>Escherichia coli</i> / <i>Shigella</i> , 99.33% |
| CFSAN066328 | SRR6764120 | FDA | <i>Escherichia coli</i> / <i>Shigella</i> , 96.59% |
| CFSAN066360 | SRR6764121 | FDA | <i>Escherichia coli</i> / <i>Shigella</i> , 100%   |

|             |            |                     |                                             |
|-------------|------------|---------------------|---------------------------------------------|
| CFSAN066380 | SRR6764124 | FDA                 | <i>Escherichia coli / Shigella</i> , 98.48% |
| CFSAN066378 | SRR6764126 | FDA                 | <i>Escherichia coli / Shigella</i> , 98.47% |
| CFSAN066375 | SRR6764127 | FDA                 | <i>Escherichia coli / Shigella</i> , 99.75% |
| CFSAN066349 | SRR6764129 | FDA                 | <i>Escherichia coli / Shigella</i> , 99.07% |
| CFSAN066354 | SRR6764131 | FDA                 | <i>Escherichia coli / Shigella</i> , 100%   |
| CFSAN066355 | SRR6764132 | FDA                 | <i>Escherichia coli / Shigella</i> , 97.79% |
| CFSAN066357 | SRR6764134 | FDA                 | <i>Escherichia coli / Shigella</i> , 96.85% |
| CFSAN066359 | SRR6764136 | FDA                 | <i>Escherichia coli / Shigella</i> , 100%   |
| CFSAN066381 | SRR6764137 | FDA                 | <i>Escherichia coli / Shigella</i> , 98.46% |
| CFSAN066382 | SRR6764138 | FDA                 | <i>Escherichia coli / Shigella</i> , 99.09% |
| CFSAN066399 | SRR6764140 | FDA                 | <i>Escherichia coli / Shigella</i> , 99.3%  |
| CFSAN066389 | SRR6764143 | FDA                 | <i>Escherichia coli / Shigella</i> , 100%   |
| CM 42-16    | A-9        | Dr. Nicolás Galarce | <i>Escherichia coli / Shigella</i> , 100%   |
| CM 118-12   | A-10       | Dr. Nicolás Galarce | <i>Escherichia coli / Shigella</i> , 98.35% |
| CM 118-15   | A-11       | Dr. Nicolás Galarce | <i>Escherichia coli / Shigella</i> , 98.31% |
| CM 118-18   | A-12       | Dr. Nicolás Galarce | <i>Escherichia coli / Shigella</i> , 98.22% |
| CV 96-1     | A-14       | Dr. Nicolás Galarce | <i>Escherichia coli / Shigella</i> , 98.24% |
| CV 96-2     | A-15       | Dr. Nicolás Galarce | <i>Escherichia coli / Shigella</i> , 96.5%  |
| CV 96-3     | A-16       | Dr. Nicolás Galarce | <i>Escherichia coli / Shigella</i> , 98.16% |
| CV 96-4     | A-17       | Dr. Nicolás Galarce | <i>Escherichia coli / Shigella</i> , 99.45% |
| CV 97-9     | A-24       | Dr. Nicolás Galarce | <i>Escherichia coli / Shigella</i> , 98.22% |
| CV 97-12    | A-25       | Dr. Nicolás Galarce | <i>Escherichia coli / Shigella</i> , 79.61% |
| CV 97-14    | A-26       | Dr. Nicolás Galarce | <i>Escherichia coli / Shigella</i> , 96.88% |
| B-6         | B-6        | Dr. Nicolás Galarce | <i>Escherichia coli / Shigella</i> , 100%   |
| B-8         | B-8        | Dr. Nicolás Galarce | <i>Escherichia coli / Shigella</i> , 98.95% |
| B-12        | B-12       | Dr. Nicolás Galarce | <i>Escherichia coli / Shigella</i> , 99.53% |
| B-13        | B-13       | Dr. Nicolás Galarce | <i>Escherichia coli / Shigella</i> , 100%   |

|         |             |                                                                      |                                             |
|---------|-------------|----------------------------------------------------------------------|---------------------------------------------|
| B-14    | B-14        | Dr. Nicolás Galarce                                                  | <i>Escherichia coli / Shigella</i> , 98.89% |
| B-16    | B-16        | Dr. Nicolás Galarce                                                  | <i>Escherichia coli / Shigella</i> , 99.63% |
| B-17    | B-17        | Dr. Nicolás Galarce                                                  | <i>Escherichia coli / Shigella</i> , 100%   |
| B-18    | B-18        | Dr. Nicolás Galarce                                                  | <i>Escherichia coli / Shigella</i> , 99.61% |
| B-19    | B-19        | Dr. Nicolás Galarce                                                  | <i>Escherichia coli / Shigella</i> , 99.68% |
| B-20    | B-20        | Dr. Nicolás Galarce                                                  | <i>Escherichia coli / Shigella</i> , 97.64% |
| B-22    | B-22        | Dr. Nicolás Galarce                                                  | <i>Escherichia coli / Shigella</i> , 99.34% |
| B-32    | B-32        | Dr. Nicolás Galarce                                                  | <i>Escherichia coli / Shigella</i> , 100%   |
| B-40    | B-40        | Dr. Nicolás Galarce                                                  | <i>Escherichia coli / Shigella</i> , 100%   |
| B-42    | B-42        | Dr. Nicolás Galarce                                                  | <i>Escherichia coli / Shigella</i> , 100%   |
| B-44    | B-44        | Dr. Nicolás Galarce                                                  | <i>Escherichia coli / Shigella</i> , 100%   |
| B-57    | B-57        | Dr. Nicolás Galarce                                                  | <i>Escherichia coli / Shigella</i> , 98.8%  |
| B-58    | B-58        | Dr. Nicolás Galarce                                                  | <i>Escherichia coli / Shigella</i> , 100%   |
| B-60    | B-60        | Dr. Nicolás Galarce                                                  | <i>Escherichia coli / Shigella</i> , 100%   |
| B-61    | B-61        | Dr. Nicolás Galarce                                                  | <i>Escherichia coli / Shigella</i> , 96.97% |
| B-64    | B-64        | Dr. Nicolás Galarce                                                  | <i>Escherichia coli / Shigella</i> , 96.09% |
| RA-13   | RA-13       | Dr. Raúl Alegría                                                     | <i>Escherichia coli / Shigella</i> , 99.32% |
| R109_1  | SRR7693849  | Instituto de Microbiología,<br>Universidad San Francisco de<br>Quito | <i>Escherichia coli / Shigella</i> , 100%   |
| B196_1  | SRR7693834  | Instituto de Microbiología,<br>Universidad San Francisco de<br>Quito | <i>Escherichia coli / Shigella</i> , 100%   |
| EC-0015 | SRR6325067  | Malbran                                                              | <i>Escherichia coli / Shigella</i> , 99.66% |
| EC-0011 | SRR6325070  | Malbran                                                              | <i>Escherichia coli / Shigella</i> , 99.2%  |
| EC-0016 | SRR6325372  | Malbran                                                              | <i>Escherichia coli / Shigella</i> , 100%   |
| IHSV7   | SRR12346095 | Instituto de Higiene                                                 | <i>Escherichia coli / Shigella</i> , 98.3%  |
| IHSV24  | SRR12346096 | Instituto de Higiene                                                 | <i>Escherichia coli / Shigella</i> , 99.13% |

|             |             |                                         |                                                    |
|-------------|-------------|-----------------------------------------|----------------------------------------------------|
| IHSV50      | SRR12346097 | Instituto de Higiene                    | <i>Escherichia coli</i> / <i>Shigella</i> , 99.23% |
| MOD1-EC1672 | SRR5330931  | Michigan State University               | <i>Escherichia coli</i> / <i>Shigella</i> , 99.61% |
| IMP 871     | SRR5927221  | USDA ARS Meat Animal<br>Research Center | <i>Escherichia coli</i> / <i>Shigella</i> , 100%   |
| IMP 886     | SRR5927222  | USDA ARS Meat Animal<br>Research Center | <i>Escherichia coli</i> / <i>Shigella</i> , 98.07% |
| IMP 1147    | SRR6952375  | USDA ARS Meat Animal<br>Research Center | <i>Escherichia coli</i> / <i>Shigella</i> , 100%   |

**Table S2.** Source, origin, isolation year, phylogroup, sequence type (ST), clonal complex (CC), serotype, virulome, and AMR genes of 130 STEC strains isolated from cattle, beef and humans in South American countries (Genomes deposited at GenBank database).

| Strain ID       | Source | Country   | Year | Phy <sup>a</sup> | ST (CC) <sup>b</sup> | Serotype | Virulome (LAA genes) <sup>c</sup>                                           | AMR genes                 |
|-----------------|--------|-----------|------|------------------|----------------------|----------|-----------------------------------------------------------------------------|---------------------------|
| MOD1-EC5234     | Human  | Argentina | 1999 | E                | 11 (11)              | O157:H7  | <i>stx2a, eae, ehaA, ehxA, hlyA, iha</i>                                    | <i>bla<sub>AmpC</sub></i> |
| ARIMEC38-12_C1  | Beef   | Argentina | 2012 | B1               | 332                  | -O:H2    | <i>stx2c, ehaA, hra, iha, lpfA, tia, (hes, lesP, pagC-like)</i>             | <i>bla<sub>AmpC</sub></i> |
| ARIMEC110-16-1M | Human  | Argentina | 2013 | E                | 11 (11)              | O157:H7  | <i>stx2a, eae, ehaA, ehxA, hlyA, iha</i>                                    | <i>bla<sub>AmpC</sub></i> |
| ARIMEC14-88M    | Human  | Argentina | 1988 | E                | 11 (11)              | -O:H7    | <i>stx2a, eae, ehaA, ehxA, hlyA, iha</i>                                    | <i>bla<sub>AmpC</sub></i> |
| ARIMEC160-17    | Human  | Argentina | 2017 | E                | 11 (11)              | O157:H7  | <i>stx2a, eae, ehaA, ehxA, hlyA, iha</i>                                    | <i>bla<sub>AmpC</sub></i> |
| ARIMEC855-11    | Beef   | Argentina | 2011 | B1               | 6661 (469)           | O8:H19   | <i>stx1a, stx2a, ehaA, ehxA, hlyA, iha, lpfA</i>                            | <i>bla<sub>AmpC</sub></i> |
| ARIMEC680-04    | Beef   | Argentina | 2004 | E                | 11 (11)              | O157:H7  | <i>stx2a, eae, ehaA, ehxA, hlyA, iha</i>                                    | <i>bla<sub>AmpC</sub></i> |
| ARIMEC286-17    | Human  | Argentina | 2017 | E                | 11 (11)              | O157:H7  | <i>stx2a, eae, ehaA, ehxA, hlyA, iha</i>                                    | <i>bla<sub>AmpC</sub></i> |
| ARIMEC707-08    | Human  | Argentina | 2008 | B1               | 679 (469)            | O163:H19 | <i>stx2d, cdtB, ehaA, hra, iha, lpfA, tia, (ag43, hes, lesP, pagC-like)</i> | <i>bla<sub>AmpC</sub></i> |
| ARIMEC731-07    | Beef   | Argentina | 2007 | B1               | 677                  | O174:H21 | <i>stx2c, ehaA, hra, iha, lpfA, tia(ag43, hes, lesP, pagC-like)</i>         | <i>bla<sub>AmpC</sub></i> |
| ARIMEC171-98    | Human  | Argentina | 1998 | E                | 11 (11)              | -O:H7    | <i>stx1a, stx2a, eae, ehaA, ehxA, hlyA, iha</i>                             | <i>bla<sub>AmpC</sub></i> |
| ARIMEC157-15-3M | Human  | Argentina | 2015 | E                | 11 (11)              | -O:H7    | <i>stx2a, eae, ehaA, iha</i>                                                | <i>bla<sub>AmpC</sub></i> |
| ARIMEC157-15-2M | Human  | Argentina | 2015 | E                | 11 (11)              | O157:H7  | <i>stx2a, eae, ehaA, ehxA, hlyA, iha</i>                                    | <i>bla<sub>AmpC</sub></i> |
| EC-0009         | Human  | Argentina | 2017 | E                | 11 (11)              | O157:H7  | <i>stx2a, eae, ehaA, ehxA, hlyA, iha</i>                                    | <i>bla<sub>AmpC</sub></i> |
| ARIMEC60-11     | Human  | Argentina | 2011 | E                | 11 (11)              | O157:H7  | <i>stx1a, eae, ehaA, iha</i>                                                | <i>bla<sub>AmpC</sub></i> |
| MOD1-EC5236     | Human  | Argentina | 1999 | B1               | 1967 (20)            | O103:H2  | <i>stx1a, eae, efa1, ehaA, ehxA, hlyA</i>                                   | <i>bla<sub>AmpC</sub></i> |
| ARIM-EXH1186-06 | Human  | Argentina | 2006 | E                | 11 (11)              | -O:H7    | <i>stx2a, eae, ehaA, iha</i>                                                | <i>bla<sub>AmpC</sub></i> |
| FWSEC0043       | Human  | Argentina | 1999 | D                | 32 (32)              | O145:H28 | <i>stx2a, eae, ehaA, ehxA, hlyA, iha</i>                                    | <i>bla<sub>AmpC</sub></i> |

|                  |        |           |      |    |            |          |                                                                                      |                            |
|------------------|--------|-----------|------|----|------------|----------|--------------------------------------------------------------------------------------|----------------------------|
| CFSAN027343      | Human  | Argentina | 1999 | B1 | 21 (29)    | O26:H11  | <i>stx1a, eae, efa1, ehaA, ehxA, hlyA, iha, lpfA</i>                                 | <i>bla</i> <sub>AmpC</sub> |
| ARIM-EXH737-14   | Human  | Argentina | 2014 | D  | 11 (11)    | -O:H7    | <i>stx2a, eae, ehaA, iha</i>                                                         | <i>bla</i> <sub>AmpC</sub> |
| ARIM-EXH831-14.6 | Beef   | Argentina | 2014 | D  | 11 (11)    | -O:H7    | <i>stx2a, eae, ehaA, ehxA, iha</i>                                                   | <i>bla</i> <sub>AmpC</sub> |
| ARIM-EXH831-14.5 | Beef   | Argentina | 2014 | D  | 11 (11)    | -O:H7    | <i>stx2a, eae, ehaA, iha</i>                                                         | <i>bla</i> <sub>AmpC</sub> |
| ARIM-EXH625-08   | Human  | Argentina | 2008 | E  | 11 (11)    | -O:H7    | <i>stx1a, eae, ehaA, ehxA, hlyA, iha</i>                                             | <i>bla</i> <sub>AmpC</sub> |
| ARIM-EXH485-02   | Beef   | Argentina | 2002 | E  | 11 (11)    | -O:H7    | <i>stx2a, eae, ehaA, iha</i>                                                         | <i>bla</i> <sub>AmpC</sub> |
| ARIM-EXH346-02   | Human  | Argentina | 2002 | E  | 11 (11)    | -O:H7    | <i>stx2a, eae, ehaA, iha</i>                                                         | <i>bla</i> <sub>AmpC</sub> |
| ARIM-EXH368-07   | Human  | Argentina | 2007 | E  | 11 (11)    | -O:H7    | <i>stx2a, eae, ehaA, iha</i>                                                         | <i>bla</i> <sub>AmpC</sub> |
| ARIM-EXH1133-06  | Human  | Argentina | 2006 | E  | 11 (11)    | O157:H7  | <i>stx2a, eae, ehaA, iha</i>                                                         | <i>bla</i> <sub>AmpC</sub> |
| ARIM-EXH668-08   | Beef   | Argentina | 2008 | E  | 11 (11)    | -O:H7    | <i>stx2a, eae, ehaA, iha</i>                                                         | <i>bla</i> <sub>AmpC</sub> |
| ARIM-EXH644-08   | Human  | Argentina | 2008 | E  | 11 (11)    | -O:H7    | <i>stx2a, eae, ehaA, iha</i>                                                         | <i>bla</i> <sub>AmpC</sub> |
| ARIM-EXH279-06   | Human  | Argentina | 2005 | E  | 11 (11)    | -O:H7    | <i>stx2a, eae, ehaA, iha</i>                                                         | <i>bla</i> <sub>AmpC</sub> |
| CFSAN066347      | Cattle | Chile     | 2016 | A  | 8134       | O172:H25 | <i>stx2a, eae, efa1, ehaA, lpfA</i>                                                  | <i>bla</i> <sub>AmpC</sub> |
| CFSAN066346      | Cattle | Chile     | 2016 | A  | 8134       | O172:H25 | <i>stx2a, eae, efa1, ehaA, ehxA, hlyA, lpfA</i>                                      | <i>bla</i> <sub>AmpC</sub> |
| CFSAN066388      | Cattle | Chile     | 2016 | B1 | 21 (29)    | O26:H11  | <i>stx1a, eae, efa1, ehaA, ehxA, hlyA, lpfA</i>                                      | <i>bla</i> <sub>AmpC</sub> |
| CFSAN066334      | Beef   | Chile     | 2016 | B1 | 8141 (156) | O174:H28 | <i>stx2c, ehxA, hlyA, iha, lpfA, saa, sab, subA, (ag43, pagC-like)</i>               | <i>bla</i> <sub>AmpC</sub> |
| CFSAN066341      | Cattle | Chile     | 2016 | B1 | 223 (155)  | O113:H21 | <i>stx1a, stx2a, cdtB, ehaA, ehxA, hlyA, iha, lpfA, sab, subA, (ag43, pagC-like)</i> | <i>bla</i> <sub>AmpC</sub> |
| CFSAN066340      | Cattle | Chile     | 2016 | B1 | 58 (155)   | O116:H21 | <i>stx2a, cdtB, ehaA, ehxA, hlyA, hra, iha, lpfA, saa, subA, (hes, pagC-like)</i>    | <i>bla</i> <sub>AmpC</sub> |
| CFSAN066345      | Cattle | Chile     | 2016 | B1 | 306        | O98:H21  | <i>stx1a, eae, ehaA, ehxA, hlyA, iha, lpfA</i>                                       | <i>bla</i> <sub>AmpC</sub> |
| CFSAN066342      | Cattle | Chile     | 2016 | B1 | 718 (446)  | O168:H8  | <i>stx2g, ehaA, ehxA, hlyA, lpfA</i>                                                 | <i>bla</i> <sub>AmpC</sub> |
| CFSAN066314      | Beef   | Chile     | 2016 | B1 | 297        | O93:H46  | <i>stx2c, ehaA, ehxA, hlyA, iha, lpfA, saa, subA</i>                                 | <i>bla</i> <sub>AmpC</sub> |
| CFSAN066313      | Beef   | Chile     | 2016 | B1 | 2387       | O185:H7  | <i>stx2c, ehaA, hra, iha, lpfA, tia, (ag43, hes, pagC-like)</i>                      | <i>bla</i> <sub>AmpC</sub> |
| CFSAN066312      | Beef   | Chile     | 2016 | B1 | 297        | O93:H46  | <i>stx2c, ehaA, ehxA, iha, lpfA, saa, subA</i>                                       | <i>bla</i> <sub>AmpC</sub> |

|             |        |       |      |    |           |          |                                                                                        |                            |
|-------------|--------|-------|------|----|-----------|----------|----------------------------------------------------------------------------------------|----------------------------|
| CFSAN066311 | Beef   | Chile | 2016 | B1 | 297       | O93:H46  | <i>stx2c, ehaA, ehxA, hlyA, iha, lpfA, saa, subA</i>                                   | <i>bla</i> <sub>AmpC</sub> |
| CFSAN066319 | Beef   | Chile | 2016 | B1 | 101 (101) | O82:H8   | <i>stx1a, ehaA, ehxA, hlyA, iha, lpfA, saa, sab, (ag43, pagC-like)</i>                 | <i>bla</i> <sub>AmpC</sub> |
| CFSAN066317 | Beef   | Chile | 2016 | B1 | 2458      | O91:H21  | <i>stx2a, cdtB, ehaA, ehxA, hlyA, hra, iha, lpfA, saa, tia, (ag43, hes, pagC-like)</i> | <i>bla</i> <sub>AmpC</sub> |
| CFSAN066316 | Beef   | Chile | 2016 | B1 | 297       | O93:H46  | <i>stx2c, ehaA, ehxA, hlyA, iha, lpfA, saa, subA</i>                                   | <i>bla</i> <sub>AmpC</sub> |
| CFSAN066315 | Beef   | Chile | 2016 | B1 | 297       | O93:H46  | <i>stx2c, ehaA, ehxA, hlyA, iha, lpfA, saa, subA</i>                                   | <i>bla</i> <sub>AmpC</sub> |
| CFSAN066372 | Cattle | Chile | 2016 | B1 | 58 (155)  | O116:H21 | <i>stx2a, ehaA, ehxA, hlyA, hra, iha, lpfA, saa, subA, tia, (hes, pagC-like)</i>       | <i>bla</i> <sub>AmpC</sub> |
| CFSAN066371 | Cattle | Chile | 2016 | B1 | 58 (155)  | O116:H21 | <i>stx2a, ehaA, ehxA, hlyA, hra, iha, lpfA, saa, subA, tia, (hes, pagC-like)</i>       | <i>bla</i> <sub>AmpC</sub> |
| CFSAN066322 | Beef   | Chile | 2016 | B1 | 8138      | O185:H7  | <i>stx2c, ehaA, hra, iha, lpfA, tia, (ag43, hes, pagC-like)</i>                        | <i>bla</i> <sub>AmpC</sub> |
| CFSAN066320 | Beef   | Chile | 2016 | B1 | 101 (101) | O82:H8   | <i>stx1a, stx2a, ehaA, ehxA, hlyA, iha, lpfA, saa, sab, (ag43, pagC-like)</i>          | <i>bla</i> <sub>AmpC</sub> |
| CFSAN066368 | Cattle | Chile | 2016 | B1 | 2458      | O91:H21  | <i>stx2a, cdtB, ehaA, ehxA, hlyA, hra, iha, lpfA, saa, tia(ag43, hes, pagC-like)</i>   | <i>bla</i> <sub>AmpC</sub> |
| CFSAN066367 | Cattle | Chile | 2016 | B1 | 2458      | O91:H21  | <i>stx2a, cdtB, ehaA, ehxA, hlyA, hra, iha, lpfA, saa, tia, (ag43, hes, pagC-like)</i> | <i>bla</i> <sub>AmpC</sub> |
| CFSAN066366 | Cattle | Chile | 2016 | G  | 657       | O183:H18 | <i>stx1a, stx2a, cdtB, ehaA, ehxA, hlyA, iha, lpfA, saa</i>                            | <i>bla</i> <sub>AmpC</sub> |
| CFSAN066365 | Cattle | Chile | 2016 | B1 | 192       | O178:H19 | <i>stx2c, ehaA, hra, iha, lpfA, tia, (hes, pagC-like)</i>                              | <i>bla</i> <sub>AmpC</sub> |
| CFSAN066370 | Cattle | Chile | 2016 | B1 | 443 (205) | O178:H19 | <i>stx1a, stx2a, ehaA, ehxA, hlyA, hra, iha, lpfA, saa, tia, (hes)</i>                 | <i>bla</i> <sub>AmpC</sub> |

|             |        |       |      |    |           |          |                                                                                                   |                                                         |
|-------------|--------|-------|------|----|-----------|----------|---------------------------------------------------------------------------------------------------|---------------------------------------------------------|
| CFSAN066309 | Beef   | Chile | 2016 | B1 | 677       | O174:H21 | <i>stx2c, ehaA, hra, iha, lpfA, tia, (ag43, hes, lesP, pagC-like)</i>                             | <i>aph(3'')-Ib, aph(6)-Id, bla<sub>AmpC</sub>, tetB</i> |
| CFSAN066302 | Beef   | Chile | 2016 | B1 | 1125      | -O:H19   | <i>stx2a, ehaA, ehxA, hlyA, hra, iha, lpfA, saa, sab, subA, tia, (ag43, hes)</i>                  | <i>bla<sub>AmpC</sub></i>                               |
| CFSAN066301 | Beef   | Chile | 2016 | B1 | 1613      | -O:H21   | <i>stx1a, stx2c, ehaA, ehxA, hlyA, hra, iha, lpfA, saa, subA, tia, (ag43, hes, pagC-like)</i>     | <i>bla<sub>AmpC</sub></i>                               |
| CFSAN066303 | Beef   | Chile | 2016 | B1 | 2387      | O185:H7  | <i>stx2c, ehaA, hra, iha, lpfA, tia, (ag43, hes, pagC-like)</i>                                   | <i>bla<sub>AmpC</sub></i>                               |
| CFSAN066306 | Beef   | Chile | 2016 | B1 | 446 (446) | O22:H8   | <i>stx2d, ehaA, iha, lpfA</i>                                                                     | <i>bla<sub>AmpC</sub></i>                               |
| CFSAN066308 | Beef   | Chile | 2016 | B1 | 297       | O93:H46  | <i>stx2c, ehaA, ehxA, hlyA, iha, lpfA, saa, subA</i>                                              | <i>bla<sub>AmpC</sub></i>                               |
| CFSAN066307 | Beef   | Chile | 2016 | B1 | 677       | O174:H21 | <i>stx2c, ehaA, hra, iha, lpfA, tia, (hes, lesP, pagC-like)</i>                                   | <i>aph(3'')-Ib, aph(6)-Id, bla<sub>AmpC</sub>, tetB</i> |
| CFSAN066390 | Cattle | Chile | 2016 | B1 | 297       | O130:H11 | <i>stx2a, ehaA, ehxA, hlyA, iha, lpfA, saa, sab, subA</i>                                         | <i>bla<sub>AmpC</sub></i>                               |
| CFSAN066391 | Cattle | Chile | 2016 | B1 | 58 (155)  | O116:H21 | <i>stx2a, ehaA, ehxA, hlyA, hra, iha, lpfA, saa, subA, tia, (hes, pagC-like)</i>                  | <i>bla<sub>AmpC</sub></i>                               |
| CFSAN066386 | Cattle | Chile | 2016 | B1 | 443 (205) | O178:H19 | <i>stx1a, stx2a, ehaA, hra, iha, lpfA, saa, tia, (ag43, hes, lesP)</i>                            | <i>bla<sub>AmpC</sub></i>                               |
| CFSAN066387 | Cattle | Chile | 2016 | B1 | 443 (205) | O178:H19 | <i>stx1a, stx2a, ehaA, ehxA, hlyA, hra, iha, lpfA, saa, tia, (hes, lesP)</i>                      | <i>bla<sub>AmpC</sub></i>                               |
| CFSAN066332 | Beef   | Chile | 2016 | B1 | 223 (55)  | O113:H21 | <i>stx2a, cdtB, ehaA, ehxA, hlyA, hra, iha, lpfA, saa, sab, subA, tia, (ag43, hes, pagC-like)</i> | <i>bla<sub>AmpC</sub></i>                               |
| CFSAN066326 | Beef   | Chile | 2016 | B1 | 2388 (20) | O15:H27  | <i>stx2d, ehaA, hra, iha, lpfA, tia</i>                                                           | <i>bla<sub>AmpC</sub></i>                               |
| CFSAN066323 | Beef   | Chile | 2016 | B1 | 332       | O171:H2  | <i>stx2c, ehaA, hra, iha, lpfA, tia, (hes, lesP, pagC-like)</i>                                   | <i>bla<sub>AmpC</sub></i>                               |
| CFSAN066324 | Beef   | Chile | 2016 | B1 | 297       | O93:H46  | <i>stx2c, ehaA, ehxA, hlyA, iha, lpfA, sab, subA</i>                                              | <i>bla<sub>AmpC</sub></i>                               |
| CFSAN066329 | Beef   | Chile | 2016 | B1 | 442       | O91:H21  | <i>stx2a, cdtB, ehaA, ehxA, hlyA, hra, iha, lpfA, tia, (ag43, hes, pagC-like)</i>                 | <i>bla<sub>AmpC</sub></i>                               |

|             |        |       |      |    |           |          |                                                                                                       |                                                               |
|-------------|--------|-------|------|----|-----------|----------|-------------------------------------------------------------------------------------------------------|---------------------------------------------------------------|
| CFSAN066327 | Beef   | Chile | 2016 | B1 | 677       | O174:H21 | <i>stx2c, ehaA, hra, iha, lpfA, tia, (hes, lesP, pagC-like)</i>                                       | <i>aph(3'')-Ib, aph(6)-Id, bla<sub>AmpC</sub>, sul2, tetB</i> |
| CFSAN066328 | Beef   | Chile | 2016 | B1 | 8135      | O116:H21 | <i>stx1a, stx2c, stx2d, cdtB, ehaA, ehxA, hlyA, hra, iha, lpfA, subA, tia, (ag43, hes, pagC-like)</i> | <i>bla<sub>AmpC</sub></i>                                     |
| CFSAN066360 | Cattle | Chile | 2016 | B1 | 446 (446) | O22:H8   | <i>stx2d, ehaA, iha, lpfA</i>                                                                         | <i>bla<sub>AmpC</sub></i>                                     |
| CFSAN066380 | Cattle | Chile | 2016 | B1 | 223 (155) | O113:H21 | <i>stx2a, ehaA, ehxA, hlyA, hra, iha, lpfA, sab, subA, tia, (ag43, hes, pagC-like)</i>                | <i>bla<sub>AmpC</sub></i>                                     |
| CFSAN066378 | Cattle | Chile | 2016 | B1 | 332       | O171:H2  | <i>stx2c, ehaA, iha, lpfA, (ag43, lesP, pagC-like)</i>                                                | <i>bla<sub>AmpC</sub></i>                                     |
| CFSAN066375 | Cattle | Chile | 2016 | B1 | 443 (205) | O178:H19 | <i>stx2c, ehaA, ehxA, hlyA, hra, iha, lpfA, saa, sab, tia, (ag43, hes, lesP)</i>                      | <i>bla<sub>AmpC</sub></i>                                     |
| CFSAN066349 | Cattle | Chile | 2016 | A  | 8134      | O172:H25 | <i>stx2a, eae, efa1, ehaA, ehxA, hlyA, lpfA</i>                                                       | <i>bla<sub>AmpC</sub></i>                                     |
| CFSAN066354 | Cattle | Chile | 2016 | B1 | 173       | O181:H49 | <i>stx2c, stx2d, ehxA, hlyA, iha, lpfA, saa, subA, (ag43, pagC-like)</i>                              | <i>bla<sub>AmpC</sub></i>                                     |
| CFSAN066355 | Cattle | Chile | 2016 | B1 | 718 (446) | O168:H8  | <i>stx2g, ehaA, ehxA, hlyA, lpfA</i>                                                                  | <i>bla<sub>AmpC</sub></i>                                     |
| CFSAN066357 | Cattle | Chile | 2016 | B1 | 332       | O171:H2  | <i>stx2a, ehaA, hra, iha, lpfA, tia, (hes, lesP, pagC-like)</i>                                       | <i>bla<sub>AmpC</sub></i>                                     |
| CFSAN066359 | Cattle | Chile | 2016 | B1 | 446 (446) | O22:H8   | <i>stx2d, ehaA, iha, lpfA</i>                                                                         | <i>bla<sub>AmpC</sub></i>                                     |
| CFSAN066381 | Cattle | Chile | 2016 | B1 | 718 (446) | O168:H8  | <i>stx2d, ehaA, hra, iha, lpfA, tia, (ag43, hes, lesP, pagC-like)</i>                                 | <i>bla<sub>AmpC</sub></i>                                     |
| CFSAN066382 | Cattle | Chile | 2016 | B1 | 223 (155) | O113:H21 | <i>stx1a, stx2a, ehaA, ehxA, hlyA, iha, lpfA, sab, subA</i>                                           | <i>bla<sub>AmpC</sub></i>                                     |
| CFSAN066399 | Beef   | Chile | 2016 | B1 | 56 (155)  | O113:H21 | <i>stx2b, stx2c, ehaA, hra, iha, lpfA, tia, (hes, pagC-like)</i>                                      | <i>bla<sub>AmpC</sub></i>                                     |
| CFSAN066389 | Cattle | Chile | 2016 | B1 | 297       | O130:H11 | <i>stx2a, ehaA, lpfA, subA</i>                                                                        | <i>bla<sub>AmpC</sub></i>                                     |
| CM 42-16    | Beef   | Chile | 2019 | B1 | 54        | O104:H2  | <i>stx1a, stx2d, ehaA, ehxA, hlyA, iha, lpfA, saa, (ag43, pagC-like)</i>                              | <i>bla<sub>AmpC</sub></i>                                     |
| CM 118-12   | Beef   | Chile | 2019 | B1 | 58 (155)  | O116:H21 | <i>stx2a, cdtB, ehaA, hra, iha, lpfA, saa, subA, tia, (hes, pagC-like)</i>                            | <i>bla<sub>AmpC</sub>, qnrB19</i>                             |

|           |        |       |      |    |             |          |                                                                                                   |                                   |
|-----------|--------|-------|------|----|-------------|----------|---------------------------------------------------------------------------------------------------|-----------------------------------|
| CM 118-15 | Beef   | Chile | 2019 | B1 | 58 (155)    | O116:H21 | <i>stx2a, cdtB, ehaA, hlyA, hra, iha, lpfA, saa, subA, tia, (hes, pagC-like)</i>                  | <i>bla<sub>AmpC</sub>, qnrB19</i> |
| CM 118-18 | Beef   | Chile | 2019 | B1 | 58 (155)    | O116:H21 | <i>stx2a, cdtB, ehaA, ehxA, hlyA, hra, iha, lpfA, saa, subA, tia, (hes, pagC-like)</i>            | <i>bla<sub>AmpC</sub></i>         |
| CV 96-1   | Beef   | Chile | 2019 | B1 | 11231 (155) | O113:H21 | <i>stx2a, cdtB, ehaA, ehxA, hlyA, hra, iha, lpfA, saa, sab, subA, tia, (ag43, hes, pagC-like)</i> | <i>bla<sub>AmpC</sub></i>         |
| CV 96-2   | Beef   | Chile | 2019 | B1 | 11231 (155) | O113:H21 | <i>stx2a, cdtB, ehaA, ehxA, hlyA, hra, iha, lpfA, saa, sab, subA, tia, (ag43, hes, pagC-like)</i> | <i>bla<sub>AmpC</sub></i>         |
| CV 96-3   | Beef   | Chile | 2019 | B1 | 11231 (155) | O113:H21 | <i>stx2a, cdtB, ehaA, ehxA, hlyA, hra, iha, lpfA, saa, sab, subA, tia, (ag43, hes, pagC-like)</i> | <i>bla<sub>AmpC</sub></i>         |
| CV 96-4   | Beef   | Chile | 2019 | B1 | 11231 (155) | O113:H21 | <i>stx2a, cdtB, ehxA, hlyA, hra, iha, lpfA, saa, sab, subA, tia, (ag43, hes, pagC-like)</i>       | <i>bla<sub>AmpC</sub></i>         |
| CV 97-9   | Beef   | Chile | 2019 | B1 | 11231 (155) | O113:H21 | <i>stx2a, cdtB, ehaA, ehxA, hlyA, hra, iha, lpfA, saa, sab, subA, tia, (ag43, hes, pagC-like)</i> | <i>bla<sub>AmpC</sub></i>         |
| CV 97-12  | Beef   | Chile | 2019 | B1 | -1635 (155) | O113:H21 | <i>stx2a, cdtB, ehaA, ehxA, hlyA, hra, iha, lpfA, saa, sab, subA, tia, (ag43, hes, pagC-like)</i> | <i>bla<sub>AmpC</sub></i>         |
| CV 97-14  | Beef   | Chile | 2019 | B1 | 11231 (155) | O113:H21 | <i>stx2a, cdtB, ehaA, ehxA, hlyA, hra, iha, lpfA, saa, sab, subA, tia, (ag43, hes, pagC-like)</i> | <i>bla<sub>AmpC</sub></i>         |
| B-6       | Cattle | Chile | 2018 | B1 | 1125        | -O:H19   | <i>stx2a, ehaA, ehxA, hlyA, iha, lpfA, saa, sab, subA</i>                                         | <i>bla<sub>AmpC</sub></i>         |
| B-8       | Cattle | Chile | 2018 | B1 | 332         | O171:H2  | <i>stx2b, ehaA, hra, iha, lpfA, tia, (hes, lesP, pagC-like)</i>                                   | <i>bla<sub>AmpC</sub></i>         |
| B-12      | Cattle | Chile | 2018 | B1 | 692         | O74:H42  | <i>stx1a, stx2d, ehaA, hra, iha, lpfA, tia, (ag43, hes, lesP)</i>                                 | <i>bla<sub>AmpC</sub></i>         |
| B-13      | Cattle | Chile | 2018 | B1 | 33          | O91:H14  | <i>stx1a, stx2d, cdtB, ehaA, iha, lpfA, saa, subA, tia</i>                                        | <i>bla<sub>AmpC</sub></i>         |

|         |        |          |      |    |           |          |                                                                          |                                                           |
|---------|--------|----------|------|----|-----------|----------|--------------------------------------------------------------------------|-----------------------------------------------------------|
| B-14    | Cattle | Chile    | 2018 | B1 | 33        | O91:H14  | <i>stx1a, stx2d, cdtB, ehaA, iha, lpfA, saa, subA, tia</i>               | <i>bla</i> <sub>AmpC</sub>                                |
| B-16    | Cattle | Chile    | 2018 | B1 | -1661     | O91:H14  | <i>stx1a, stx2d, cdtB, ehaA, iha, lpfA, saa, subA, tia, (ag43)</i>       | <i>bla</i> <sub>AmpC</sub>                                |
| B-17    | Cattle | Chile    | 2018 | B1 | 332       | O171:H2  | <i>stx2c, stx2d, ehaA, hra, iha, lpfA, tia, (hes, lesP, pagC-like)</i>   | <i>bla</i> <sub>AmpC</sub>                                |
| B-18    | Cattle | Chile    | 2018 | B1 | 448 (448) | O148:H8  | <i>stx2c, ehaA, iha, lpfA, tia</i>                                       | <i>bla</i> <sub>AmpC</sub>                                |
| B-19    | Cattle | Chile    | 2018 | B1 | 448 (448) | O148:H8  | <i>stx2c, iha, lpfA, tia</i>                                             | <i>bla</i> <sub>AmpC</sub>                                |
| B-20    | Cattle | Chile    | 2018 | B1 | 448 (448) | O148:H8  | <i>stx2c, ehaA, iha, lpfA, tia</i>                                       | <i>bla</i> <sub>AmpC</sub>                                |
| B-22    | Cattle | Chile    | 2018 | B1 | 1248      | -O:H21   | <i>stx1a, stx2d, ehaA, ehxA, hlyA, iha, lpfA, saa, (ag43, pagC-like)</i> | <i>bla</i> <sub>AmpC</sub>                                |
| B-32    | Cattle | Chile    | 2018 | B1 | 297       | O130:H11 | <i>stx1a, stx2d, ehaA, ehxA, hlyA, iha, lpfA, saa, subA</i>              | <i>bla</i> <sub>AmpC</sub>                                |
| B-40    | Cattle | Chile    | 2018 | B1 | 297       | O130:H11 | <i>stx2a, ehaA, ehxA, hlyA, iha, lpfA, saa, sab, subA</i>                | <i>bla</i> <sub>AmpC</sub>                                |
| B-42    | Cattle | Chile    | 2018 | B1 | 446 (446) | O22:H8   | <i>stx2d, ehaA, iha, lpfA</i>                                            | <i>bla</i> <sub>AmpC</sub>                                |
| B-44    | Cattle | Chile    | 2018 | B1 | 443 (205) | O178:H19 | <i>stx1a, stx2a, ehaA, ehxA, hlyA, hra, iha, lpfA, saa, tia, (hes)</i>   | <i>bla</i> <sub>AmpC</sub>                                |
| B-57    | Cattle | Chile    | 2018 | G  | 657       | O183:H18 | <i>stx1a, stx2a, ehaA, ehxA, hlyA, iha, lpfA, saa</i>                    | <i>bla</i> <sub>AmpC</sub>                                |
| B-58    | Cattle | Chile    | 2018 | B1 | 1125      | -O:H19   | <i>stx2d, cdtB, ehaA, ehxA, hlyA, iha, lpfA, saa, sab, subA</i>          | <i>bla</i> <sub>AmpC</sub>                                |
| B-60    | Cattle | Chile    | 2018 | B1 | 1125      | -O:H19   | <i>stx2d, cdtB, ehaA, ehxA, hlyA, iha, lpfA, saa, sab, subA</i>          | <i>bla</i> <sub>AmpC</sub>                                |
| B-61    | Cattle | Chile    | 2018 | G  | 11238     | O183:H18 | <i>stx1a, stx2a, ehaA, ehxA, hlyA, iha, lpfA, saa</i>                    | <i>bla</i> <sub>AmpC</sub>                                |
| B-64    | Cattle | Chile    | 2018 | G  | 657       | O183:H18 | <i>stx1a, stx2a, ehaA, ehxA, hlyA, iha, lpfA, saa</i>                    | <i>bla</i> <sub>AmpC</sub>                                |
| RA-13   | Cattle | Chile    | 2019 | B1 | 297       | O130:H11 | <i>stx1a, stx2d, ehaA, iha, lpfA, saa, sab, subA</i>                     | <i>bla</i> <sub>AmpC</sub>                                |
| R109_1  | Human  | Ecuador  | 2015 | B1 | 16 (29)   | O111:H8  | <i>stx1a, eae, ehaA, iha, lpfA</i>                                       | <i>bla</i> <sub>AmpC</sub>                                |
| B196_1  | Human  | Ecuador  | 2015 | B1 | 21 (29)   | O69:H11  | <i>stx1a, eae, efa1, ehaA, ehxA, hlyA, lpfA</i>                          | <i>bla</i> <sub>AmpC</sub>                                |
| EC-0015 | Human  | Paraguay | 2009 | E  | 11 (11)   | O157:H7  | <i>stx2a, eae, ehaA, iha</i>                                             | <i>bla</i> <sub>AmpC</sub> , <i>bla</i> <sub>TEM-1B</sub> |
| EC-0011 | Human  | Paraguay | 2003 | E  | 11 (11)   | O157:H7  | <i>stx2c, eae, ehaA, iha</i>                                             | <i>bla</i> <sub>AmpC</sub>                                |

|             |       |          |      |    |           |          |                                                                                              |                                                                                      |
|-------------|-------|----------|------|----|-----------|----------|----------------------------------------------------------------------------------------------|--------------------------------------------------------------------------------------|
| EC-0016     | Human | Paraguay | 2009 | E  | 11 (11)   | O157:H7  | <i>stx2a, eae, ehaA, iha</i>                                                                 | <i>bla<sub>AmpC</sub>, bla<sub>TEM-1B</sub></i>                                      |
| IHSV7       | Human | Uruguay  | 2017 | B1 | 16 (29)   | O111:H8  | <i>stx1a, stx2a, eae, efa1, ehaA, ehxA, hlyA, iha, lpfA</i>                                  | <i>aph(3')-Ia, aph(3'')-Ib, bla<sub>AmpC</sub>, bla<sub>TEM-1B</sub>, sul2, tetA</i> |
| IHSV24      | Human | Uruguay  | 2011 | E  | 11 (11)   | O157:H7  | <i>stx1a, stx2a, eae, ehaA, iha</i>                                                          | <i>bla<sub>AmpC</sub></i>                                                            |
| IHSV50      | Human | Uruguay  | 2016 | A  | 342       | O145:H25 | <i>stx2a, eae, efa1, ehxA, hlyA, lpfA</i>                                                    | <i>bla<sub>AmpC</sub>, fosA7</i>                                                     |
| MOD1-EC1672 | Human | Uruguay  | -    | A  | 342       | O145:H25 | <i>stx2a, eae, efa1, ehaA, ehxA, hlyA, lpfA</i>                                              | <i>bla<sub>AmpC</sub>, fosA7</i>                                                     |
| IMP 871     | Beef  | Uruguay  | 2004 | B1 | 679 (469) | O163:H19 | <i>stx2a, cdtB, ehaA, ehxA, hlyA, hra, iha, lpfA, saa, subA, tia, (ag43, hes, pagC-like)</i> | <i>bla<sub>AmpC</sub></i>                                                            |
| IMP 886     | Beef  | Uruguay  | 2005 | B1 | 443 (205) | O178:H19 | <i>stx1a, stx2a, ehaA, ehxA, hlyA, hra, iha, lpfA, saa, tia, (hes)</i>                       | <i>bla<sub>AmpC</sub></i>                                                            |
| IMP 1147    | Beef  | Uruguay  | 2005 | B1 | 2388 (20) | O15:H27  | <i>stx1c, stx2d, ehaA, hra, iha, lpfA, tia</i>                                               | <i>bla<sub>AmpC</sub></i>                                                            |

<sup>a</sup> Phylogenetic group determined *in silico* by Clermont typing (<http://clermonttyping.iame-research.center/>)

<sup>b</sup> Strain B-16 belongs to a novel ST [single locus variant (SLV) of ST1661 at the *fumC* allele].

<sup>c</sup> Virulence genes associated with Locus of Adhesion and Autoaggregation (LAA).
